# Supplementary material for: Tunable Schottky contacts in hybrid graphene–phosphorene nanocomposites
Source: Royal Society of Chemistry journal article supplement (doi:10.1039/c5tc00759c), 2015-01-01
Supplement: c5tc00759c1.pdf [file c5tc00759c1.pdf]

# Supporting information

## Tunable Schottky Contacts in Hybrid Graphene/Phosphorene Nanocomposite

Wei Hu,<sup>1,2,\*</sup> TianWang,<sup>3</sup> and Jinlong Yang<sup>2,4,\*</sup>

<sup>1</sup>*Computational Research Division, Lawrence Berkeley National Laboratory,  
Berkeley, CA 94720, USA*

<sup>2</sup>*Hefei National Laboratory for Physical Sciences at Microscale, University of  
Science and Technology of China, Hefei, Anhui 230026, China*

<sup>3</sup>*Department of Precision Machinery and Precision Instrumentation, University of  
Science and Technology of China, Hefei, Anhui 230026, China*

<sup>4</sup>*Synergetic Innovation Center of Quantum Information and Quantum Physics,  
University of Science and Technology of China, Hefei, Anhui 230026, China*

*Email: [whu@lbl.gov](mailto:whu@lbl.gov) and [jlyang@ustc.edu.cn](mailto:jlyang@ustc.edu.cn)*

In order to simulate hybrid composite structures of 2D van der Waals heterojunctions made layer by layer, we need to choose two special supercells for each 2D material with different crystal systems and lattice constants, making them have a smaller lattice mismatch for each other. We have written a small program named LatticeMatch to construct theoretical models for 2D van der Waals heterojunctions with a smaller lattice mismatch for different 2D materials. Its basic idea is based on the rotation matrix of extended orthogonal lattices for different 2D materials to search their minimum matching supercell models in 2D van der Waals heterojunctions.

! Copyright (c) 2014 The Regents of the University of Science and Technology of China.

! Author: Wei Hu

! E-mail: gyw4588@mail.ustc.edu.cn

! Google Scholar Citations: <http://scholar.google.com/citations?user=t8Ncyb4AAAAJ>

! This file is the code of LatticeMatch. All rights reserved.

! Redistribution and use in source and binary forms, with or without modification,

! are permitted provided that the following conditions are met:

! (1) Redistributions of source code must retain the above copyright notice, this

! list of conditions and the following disclaimer.

! (2) Redistributions in binary form must reproduce the above copyright notice,

! this list of conditions and the following disclaimer in the documentation

! and/or other materials provided with the distribution.

! (3) Neither the name of the University of Science and Technology of China

! nor the names of its contributors may be used to endorse or promote products

! derived from this software without specific prior written permission.

! The LatticeMatch code is used to achieve lattice matching for different 2D systems.

! Its basic idea is based on the rotation matrix of orthogonal lattice to search the

! minimum matching model.

program LatticeMatch

implicit none

integer i,j,ii,jj,k,kk,kki,M,N,Nmax

parameter (Nmax=15)

real PI

parameter (PI=3.14159265358979323846)

real Gx(Nmax),Gy(Nmax),Cx(Nmax),Cy(Nmax),Test(Nmax)

real Cax(Nmax,Nmax),Cby(Nmax,Nmax),Rx(Nmax),Ry(Nmax)

real Ga,Gb,Ca,Cb,L,Lx,Ly,Lg,Lc,a,Aa,Aaa,b

Ga=2.4690

Gb=4.2760 ! Orthogonal lattice for graphene

Ca=3.2981

Cb=4.6232 ! Orthogonal lattice for phosphorene

a=0.01 ! The minimum angle of rotation

b=0.25 ! Error control parameter

M=180/a

do i=1, Nmax

  Gx(i)=0.00

  Gy(i)=0.00

  Cx(i)=0.00

  Cy(i)=0.00

  Rx(i)=0.00

  Ry(i)=0.00

  Test(i)=0.00

enddo

do i=1, Nmax

  do j=1, Nmax

    Cax(i,j)=0.00

    Cby(i,j)=0.00

  enddo

enddo

N=(Nmax+1)/2

if (N.gt.1)then

  do i=1, N-1

    Gx(i)=0.00-Ga\*(N-i)

    Gy(i)=0.00-Gb\*(N-i)

    Cx(i)=0.00-Ca\*(N-i)

    Cy(i)=0.00-Cb\*(N-i)

  enddo

endif

do i=N, Nmax

  Gx(i)=Ga\*(i-N)

  Gy(i)=Gb\*(i-N)

  Cx(i)=Ca\*(i-N)

  Cy(i)=Cb\*(i-N)

enddo

```

do i=1, Nmax
  do j=1, Nmax

    write(2,"(1X,a3,i2,a2,f8.4,a4,i2,a2,f8.4)")
&          "Gx(",i,"),"Gx(i)," Gy(",j,"),"Gy(j)

    write(3,"(1X,a3,i2,a2,f8.4,a4,i2,a2,f8.4)")
&          "Cx(",i,"),"Cx(i)," Cy(",j,"),"Cy(j)

  enddo
enddo

do k=1,M !M=180/a

  Aa=(k-1)*a
  Aaa=Aa*(2*PI/360)

  do i=1, Nmax
    do j=1, Nmax
      Cax(i,j)=0.00
      Cby(i,j)=0.00
    enddo
  enddo

! Rotating the lattice

  do i=1, Nmax
    do j=1, Nmax

      Lc=sqrt(Cx(i)*Cx(i)+Cy(j)*Cy(j))

      if(Lc.gt.0.0001)then

        Cax(i,j)=Lc*(cos(Aaa)*(Cx(i)/Lc)-sin(Aaa)*(Cy(j)/Lc))
        Cby(i,j)=Lc*(sin(Aaa)*(Cx(i)/Lc)+cos(Aaa)*(Cy(j)/Lc))

      endif

    enddo
  enddo

  write(4,"(1X,a3,f8.4)")Aa="Aa"

```

```

do i=1, Nmax
  do j=1, Nmax

    write(4,"(1X,a4,i2,a1,i2,a2,f8.4,a5,i2,a1,i2,a2,f8.4)")
&      "Cax(",i," ",j,")=",Cax(i,j)," Cby(",i," ",j,")=",Cby(i,j)

    enddo
  enddo

  kk=0

  do i=1, Nmax
    do j=1, Nmax

      do ii=1, Nmax
        do jj=1, Nmax

          Lx=Gx(i)-Cax(ii,jj)
          Ly=Gy(j)-Cby(ii,jj)

          L=sqrt(Lx*Lx+Ly*Ly)

          if(L.lt.b)then

            kk=kk+1

            Rx(i)=Gx(i)
            Ry(j)=Gy(j)

            Test(kk)=0.00

            if((abs(Gx(i)).gt.0.0001).and.(abs(Gy(j)).gt.0.0001)) then
              Test(kk)=Gx(i)/Gy(j)
            endif

            write(7,"(1X,a3,i4)")"kk=",kk
            write(7,"(1X,a5,i4,a2,f6.2)")"Test(",kk,")=",Test(kk)
            write(7,"(1X,a3,f8.4)")"Aa=",Aa
            write(7,"(1X,a3,i2,a2,f8.4,a4,i2,a2,f8.4)")
&      "Gx(",i,")=",Rx(i)," Gy(",j,")=",Ry(j)

```

```
endif
```

```
enddo  
enddo
```

```
enddo  
enddo
```

! Output qualified lattice matching angle

```
if(kk.ge.7)then
```

```
write(*,"(1X,a3)")"OK!"  
write(*,"(1X,a3,f8.4)")"Aa=",Aa  
write(*,"(1X,a3,i4)")"kk=",kk
```

```
do kki=1, kk  
  write(*,"(1X,a5,i4,a2,f6.2)")"Test(",kki,")=",Test(kki)  
enddo
```

```
write(8,"(1X,a3)")"OK!"  
write(8,"(1X,a3,f8.4)")"Aa=",Aa  
write(8,"(1X,a3,i4)")"kk=",kk
```

```
do kki=1, kk  
  write(8,"(1X,a5,i4,a2,f6.2)")"Test(",kki,")=",Test(kki)  
enddo
```

```
endif
```

```
enddo ! do k=1,M
```

```
end
```
